# Supplementary material for: Exogenous spermidine improves seed germination of sweet corn via involvement in phytohormone interactions, H2O2 and relevant gene expression
Source: PubMed Central journal article supplement (PMC5209872; doi:10.1186/s12870-016-0951-9), 2017-01-03
Supplement: 12870_2016_951_MOESM1_ESM.pdf [file 12870_2016_951_MOESM1_ESM.pdf]

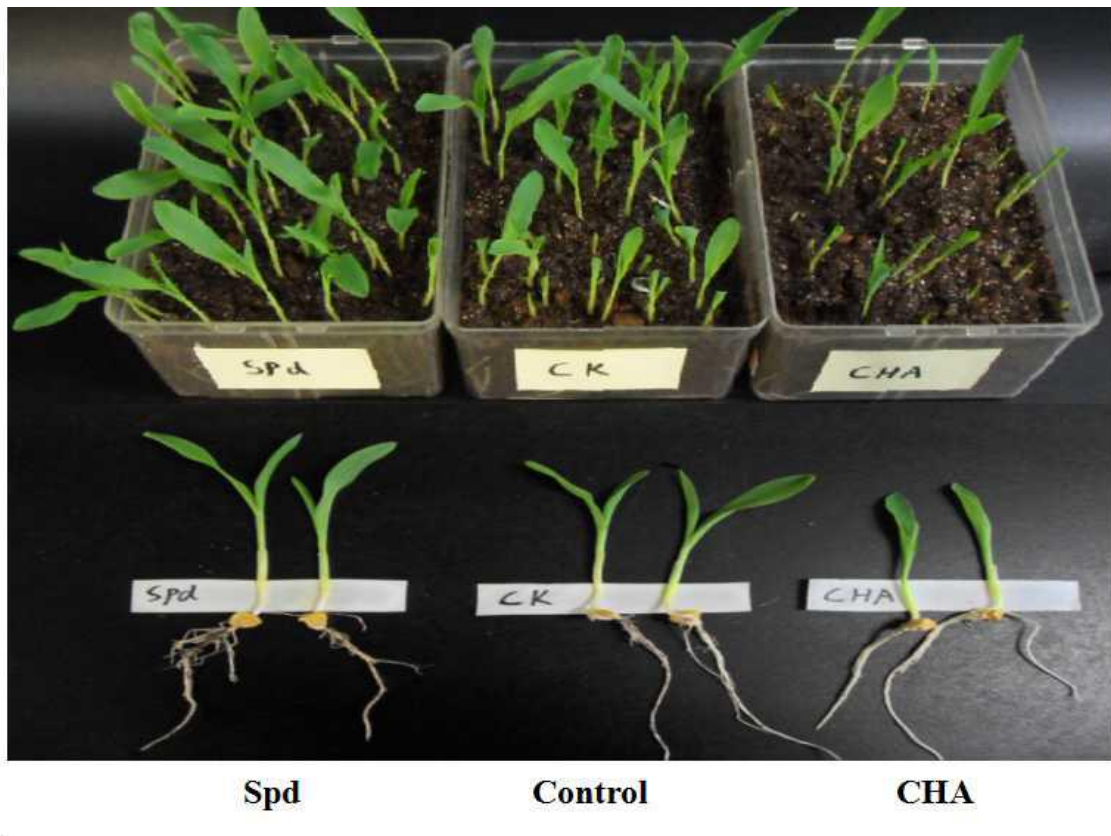

### **Treatment**

Additional file 1: Effects of presoaking treatments on sweet corn seedling characteristics. Control, seeds presoaking with distilled water; Spd, seeds presoaking with spermidine; CHA, seeds presoaking with cyclohexylamine. Seeds were imbibed in peat substrate moistened with water at 25°C for 7 days.
